# Supplementary material for: Identifying a cis-element in PtoCP1 promoter for efficiently controlling constitutive gene expression in Populus tomentosa
Source: PeerJ journal article supplement (doi:10.7717/peerj.18292), 2024-10-22
Supplement: PCR.xls [file PCR.xls]

## Sheet: Sheet1
		Expression levels of GUS under the control of a PtoCP1 promoter full-length and deletion fragments in transgenic Arabidopsis thaliana seedlings.
	Ct average			2-ΔΔCt	positive error	negative error	significance
actin P0	17.95		P0-GUS	1	1.11713	0.895154
P0	24.0733		P1-GUS	0.97716	1.03391	0.923524	0.735882
actin P1	17.22		P2-GUS	0.434271	0.505517	0.373066	0.00161882
P1	23.3767		P3-GUS	0.0200535	0.0207511	0.0193794	0.000105116
actin P2	17.2133		P4-GUS	0.00683268	0.00757135	0.00616607	9.97311e-05
P2	24.54
actin P3	17.2133
P3	31.2233
actin P4	19.46
P4	30.42
